# Supplementary material for: Presence of β-Lactamase-producing Enterobacterales and Salmonella Isolates in Marine Mammals
Source: MDPI journal article supplement (doi:10.3390/ijms22115905), 2021-05-31
Supplement: s1 [file s1]

**Supplementary Table S5.** List of primers used in this study

| Name of primer | Primer sequence (5'-3')                | Target                                                                                    | Ta (°C) | Amplicon size (bp) | Reference* |
|----------------|----------------------------------------|-------------------------------------------------------------------------------------------|---------|--------------------|------------|
| CMY /F         | ATG ATG AAA AAA TCG TTA TGC TGC        | <i>bla<sub>CMY</sub></i>                                                                  | 58      | 1138               | [107]      |
| CMY /R         | GCT TTT CAA GAA TGC GCC AGG            |                                                                                           |         |                    |            |
| CTX-M /F       | ATG TGC AGY ACC AGT AAR GTK ATG GC     | <i>bla<sub>CTX-M</sub></i>                                                                | 55      | 592                | [107]      |
| CTX-M /R       | TGG GTR AAR TAR GTS ACC AGA AYS AGC GG |                                                                                           |         |                    |            |
| OXA-1 /F       | ATG AAA AAC ACA ATA CAT ATC AAC TTC GC | <i>bla<sub>OXA-1</sub></i>                                                                | 55      | 820                | [107]      |
| OXA-1 /R       | GTG TGT TTA GAA TGG TGA TCG CAT T      |                                                                                           |         |                    |            |
| OXA-2 /F       | ACG ATA GTT GTG GCA GAC GAA C          | <i>bla<sub>OXA-2</sub></i>                                                                | 55      | 601                | [107]      |
| OXA-2 /R       | ATY CTG TTT GGC GTA TCR ATA TTC        |                                                                                           |         |                    |            |
| SHV /F         | TTA TCT CCC TGT TAG CCA CC             | <i>bla<sub>SHV</sub></i>                                                                  | 55      | 796                | [107]      |
| SHV /R         | GAT TTG CTG ATT TCG CTC GG             |                                                                                           |         |                    |            |
| TEM /F         | GCG GAA CCC CTA TTT G                  | <i>bla<sub>TEM</sub></i>                                                                  | 55      | 964                | [107]      |
| TEM /R         | ACC ATT GCT TAA TCA GTG AG             |                                                                                           |         |                    |            |
| MOXMF          | GCT GCT CAA GGA GCA CAG GAT            | <i>bla<sub>MOX-1</sub>, bla<sub>MOX-2</sub>, bla<sub>CMY-1</sub>, bla<sub>CMY-8</sub></i> | 64      | 520                | [110]      |
| MOXMR          | CAC ATT GAC ATA GGT GTG GTG C          | <i>to bla<sub>CMY-11</sub></i>                                                            |         |                    |            |
| CITMF          | TGG CCA GAA CTG ACA GGC AAA            | <i>bla<sub>LAT-1</sub> to bla<sub>LAT-4</sub>, bla<sub>CMY-2</sub> to</i>                 | 64      | 462                | [110]      |
| CITMR          | TTT CTC CTG AAC GTG GCT GGC            | <i>bla<sub>CMY-7</sub>, bla<sub>BIL-1</sub></i>                                           |         |                    |            |
| DHAMF          | AAC TTT CAC AGG TGT GCT GGG T          | <i>bla<sub>DHA-1</sub>, bla<sub>DHA-2</sub></i>                                           | 64      | 405                | [110]      |
| DHAMR          | CCG TAC GCA TAC TGG CTT TGC            |                                                                                           |         |                    |            |
| ACCMF          | AAC AGC CTC AGC AGC CGG TTA            | <i>bla<sub>ACC</sub></i>                                                                  | 64      | 346                | [110]      |
| ACCMR          | TTC GCC GCA ATC ATC CCT AGC            |                                                                                           |         |                    |            |
| EBCMF          | TCG GTA AAG CCG ATG TTG CGG            | <i>bla<sub>MIR-1</sub>, bla<sub>ACT-1</sub></i>                                           | 64      | 302                | [110]      |
| EBCMR          | CTT CCA CTG CGG CTG CCA GTT            |                                                                                           |         |                    |            |
| FOXMF          | AAC ATG GGG TAT CAG GGA GAT G          | <i>bla<sub>FOX-1</sub> to bla<sub>FOX-5b</sub></i>                                        | 64      | 190                | [110]      |
| FOXMR          | CAA AGC GCG TAA CCG GAT TGG            |                                                                                           |         |                    |            |

|                                      |                                                                          |                                                                                                                                                                                                                                                                                           |    |     |       |
|--------------------------------------|--------------------------------------------------------------------------|-------------------------------------------------------------------------------------------------------------------------------------------------------------------------------------------------------------------------------------------------------------------------------------------|----|-----|-------|
| MultiCaseACC_for<br>MultiCaseACC_rev | CAC CTC CAG CGA CTT GTT AC<br>GTT AGC CAG CAT CAC GAT CC                 | <i>bla</i> <sub>ACC-1</sub> , <i>bla</i> <sub>ACC-2</sub>                                                                                                                                                                                                                                 | 60 | 346 | [109] |
| MultiCaseFOX_for<br>MultiCaseFOX_rev | CTA CAG TGC GGG TGG TTT<br>CTA TTT GCG GCC AGG TGA                       | <i>bla</i> <sub>FOX-1</sub> to <i>bla</i> <sub>FOX-5</sub>                                                                                                                                                                                                                                | 60 | 162 | [109] |
| MultiCaseMOX_for<br>MultiCaseMOX_rev | GCA ACA ACG ACA ATC CAT CCT<br>GGG ATA GGC GTA ACT CTC CCA A             | <i>bla</i> <sub>MOX-1</sub> , <i>bla</i> <sub>MOX-2</sub> , <i>bla</i> <sub>CMY-1</sub> , <i>bla</i> <sub>CMY-8</sub><br>to <i>bla</i> <sub>CMY-11</sub> , <i>bla</i> <sub>CMY-19</sub>                                                                                                   | 60 | 895 | [109] |
| MultiCaseDHA_for<br>MultiCaseDHA_rev | TGA TGG CAC AGC AGG ATA TTC<br>GCT TTG ACT CTT TCG GTA TTC G             | <i>bla</i> <sub>DHA-1</sub> , <i>bla</i> <sub>DHA-2</sub>                                                                                                                                                                                                                                 | 60 | 997 | [109] |
| MultiCaseCIT_for<br>MultiCaseCIT_rev | CGA AGA GGC AAT GAC CAG AC<br>ACG GAC AGG GTT AGG ATA GY                 | <i>bla</i> <sub>LAT-1</sub> to <i>bla</i> <sub>LAT-3</sub> , <i>bla</i> <sub>BIL-1</sub> , <i>bla</i> <sub>CMY-2</sub><br>to <i>bla</i> <sub>CMY-7</sub> , <i>bla</i> <sub>CMY-12</sub> to <i>bla</i> <sub>CMY-18</sub> ,<br><i>bla</i> <sub>CMY-21</sub> to <i>bla</i> <sub>CMY-23</sub> | 60 | 538 | [109] |
| MultiCaseEBC_for<br>MultiCaseEBC_rev | CGG TAA AGC CGA TGT TGC G<br>AGC CTA ACC CCT GAT ACA                     | <i>bla</i> <sub>ACT-1</sub> , <i>bla</i> <sub>MIR-1</sub>                                                                                                                                                                                                                                 | 60 | 683 | [109] |
| sul1 /F<br>sul1 /R                   | CTT CGA TGA GAG CCG GCG GC<br>GCA AGG CGG AAA CCC GCG CC                 | <i>sul1</i>                                                                                                                                                                                                                                                                               | 68 | 417 | [104] |
| sul2 /F<br>sul2 /R                   | AGG GGG CAG ATG TGA TCG AC<br>GCA GAT GAT TTC GCC AAT TG                 | <i>sul2</i>                                                                                                                                                                                                                                                                               | 58 | 249 | [104] |
| sul3 /F<br>sul3 /R                   | GAG CAA GAT TTT TGG AAT CG<br>CAT CTG CAG CTA ACC TAG GGC TTT GGA        | <i>sul3</i>                                                                                                                                                                                                                                                                               | 55 | 789 | [104] |
| dfrA1 /F<br>dfrA1 /R                 | ACG GAT CCT GGC TGT TGG TTG GAC GC<br>CGG AAT TCA CCT TCC GGC TCG ATG TC | <i>dfrA1</i>                                                                                                                                                                                                                                                                              | 55 | 254 | [104] |
| dfrA12 /F<br>dfrA12 /R               | ACT CGG AAT CAG TAC GCA<br>GTG TAC GGA ATT ACA GCT                       | <i>dfrA12</i>                                                                                                                                                                                                                                                                             | 51 | 462 | [104] |
| dfrA14 /F<br>dfrA14 /R               | TTA ACC CAG GAT GAG AAC CT<br>CGA TTG CAT AGC TTT GTT AA                 | <i>dfrA14</i>                                                                                                                                                                                                                                                                             | 56 | 510 | [105] |
| dfrA17 /F<br>dfrA17 /R               | GAT TTC TGC AGT GTC AGA<br>CTC AGG CAT TAT AGG GAA                       | <i>dfrA17</i>                                                                                                                                                                                                                                                                             | 50 | 384 | [104] |
| dfrA19 /F<br>dfrA19 /R               | AGT CGC TGT GGA TTC TAA GT<br>CAA TGT GAA AAT TGT TCT GG                 | <i>dfrA19</i>                                                                                                                                                                                                                                                                             | 56 | 455 | [103] |
| tetA /F<br>tetA /R                   | GCT ACA TCC TGC TTG CCT TC<br>CAT AGA TCG CCG TGA AGA GG                 | <i>tet</i> (A)                                                                                                                                                                                                                                                                            | 55 | 210 | [104] |
| tetB /F<br>tetB /R                   | TTG GTT AGG GGC AAG TTT TG<br>GTA ATG GGC CAA TAA CAC CG                 | <i>tet</i> (B)                                                                                                                                                                                                                                                                            | 55 | 659 | [104] |
| tetC /F<br>tetC /R                   | CTT GAG AGC CTT CAA CCC AG<br>ATG GTC GTC ATC TAC CTG CC                 | <i>tet</i> (C)                                                                                                                                                                                                                                                                            | 55 | 418 | [104] |

|          |                                    |               |    |     |       |
|----------|------------------------------------|---------------|----|-----|-------|
| tetD /F  | AAA CCA TTA CGG CAT TCT GC         | <i>tet(D)</i> | 55 | 787 | [104] |
| tetD /R  | GAC CGG ATA CAC CAT CCA TC         |               |    |     |       |
| tetE /F  | AAA CCA CAT CCT CCA TAC GC         | <i>tet(E)</i> | 55 | 278 | [104] |
| tetE /R  | AAA TAG GCC ACA ACC GTC AG         |               |    |     |       |
| tetG /F  | CAG CTT TCG GAT TCT TAC GG         | <i>tet(G)</i> | 55 | 468 | [104] |
| tetG /R  | GAT TGG TGA GGC TCG TTA GC         |               |    |     |       |
| catA /F  | CCT GCC ACT CAT CGC AGT            | <i>catA</i>   | 55 | 623 | [104] |
| catA /R  | CCA CCG TTG ATA TAT CCC            |               |    |     |       |
| cmlA /F  | TGT CAT TTA CGG CAT ACT CG         | <i>cmlA</i>   | 55 | 455 | [104] |
| cmlA /R  | ATC AGG CAT CCC ATT CCC AT         |               |    |     |       |
| cfr /F   | TGA AGT ATA AAG CAG GTT GGG AGT CA | <i>cfr</i>    | 48 | 746 | [108] |
| cfr /R   | ACC ATA TAA TTG ACC ACA AGC AGC    |               |    |     |       |
| floR /F  | GCG ATA TTC ATT ACT TTG GC         | <i>floR</i>   | 50 | 425 | [104] |
| floR /R  | TAG GAT GAA GGT GAG GAA TG         |               |    |     |       |
| aadA1 /F | CGA CTC AAC TAT CAG AGG TA         | <i>aadA1</i>  | 51 | 384 | [104] |
| aadA1 /R | CTT TTG TCA GCA AGA TAG CC         |               |    |     |       |
| aadA2 /F | CGG TGA CCA TCG AAA TTT CG         | <i>aadA2</i>  | 55 | 249 | [104] |
| aadA2 /R | CTA TAG CGC GGA GCG TCT CGC        |               |    |     |       |
| aadA4 /F | ATC TTG CGA TTT TGC TGA CC         | <i>aadA4</i>  | 53 | 198 | [102] |
| aadA4 /R | TGT ACC AAA TGC GAG CAA GA         |               |    |     |       |
| aadA5 /F | CAC TGG ACA CAA TCC ACC TG         | <i>aadA5</i>  | 55 | 217 | [104] |
| aadA5 /R | CCA AGG CAC TAC TTC GCT TC         |               |    |     |       |
| aadB /F  | GGG CGC GTC ATG GAG GAG TT         | <i>aadB</i>   | 67 | 328 | [96]  |
| aadB /R  | TAT CGC GAC CTG AAA GCG GC         |               |    |     |       |
| strA /F  | CCT ATC GGT TGA TCA ATG TC         | <i>strA</i>   | 58 | 250 | [104] |
| strA /R  | GAA GAG TTT TAG GGT CCA CC         |               |    |     |       |
| strB /F  | ATC GTC AAG GGA TTG AAA CC         | <i>strB</i>   | 55 | 509 | [97]  |
| strB /R  | GGA TCG TAG AAC ATA TTG GC         |               |    |     |       |
| qepA /F  | GCA GGT CCA GCA GCG GGT AG         | <i>qepA</i>   | 60 | 199 | [100] |
| qepA /R  | CTT CCT GCC CGA GTA TCG TG         |               |    |     |       |
| qnrA /F  | ATT TCT CAC GCC AGG ATT TG         | <i>qnrA</i>   | 53 | 516 | [98]  |
| qnrA /R  | GAT CGG CAA AGG TTA GGT CA         |               |    |     |       |
| qnrB /F  | GAT CGT GAA AGC CAG AAA GG         | <i>qnrB</i>   | 53 | 469 | [98]  |
| qnrB /R  | ACG ATG CCT GGT AGT TGT CC         |               |    |     |       |
| qnrC /F  | GGG TTG TAC ATT TAT TGA ATC        | <i>qnrC</i>   | 50 | 447 | [106] |
| qnrC /R  | TCC ACT TTA CGA GGT TCT            |               |    |     |       |

|               |                                |                   |    |     |       |
|---------------|--------------------------------|-------------------|----|-----|-------|
| qnrD /F       | CGA GAT CAA TTT ACG GGG AAT A  | <i>qnrD</i>       | 50 | 582 | [101] |
| qnrD /R       | AAC AAG CTG AAG CGC CTG        |                   |    |     |       |
| qnrS /F       | ACG ACA TTC GTC AAC TGC AA     | <i>qnrS</i>       | 53 | 417 | [98]  |
| qnrS /R       | TAA ATT GGC ACC CTG TAG GC     |                   |    |     |       |
| aac(6')-Ib /F | TTG CGA TGC TCT ATG AGT GGC TA | <i>aac(6')-Ib</i> | 55 | 482 | [99]  |
| aac(6')-Ib /R | CTC GAA TGC CTG GCG TGT TT     |                   |    |     |       |

\*Reference numbers correspond to the reference numbers in the main manuscript

## References

107. Dierikx, C.M.; van Duijkeren, E.; Schoormans, A.H.W.; van Essen-Zandbergen, A.; Veldman, K.; Kant, A.; Huijsdens, X.W.; van der Zwaluw, K.; Wagenaar, J.A.; Mevius, D.J. Occurrence and characteristics of extended-spectrum- $\beta$ -lactamase- and AmpC-producing clinical isolates derived from companion animals and horses. *J. Antimicrob. Chemother.* **2012**, *67*, 1368–1374, doi:10.1093/jac/dks049.
110. Pérez-Pérez, F.J.; Hanson, N.D. Detection of plasmid-mediated AmpC beta-lactamase genes in clinical isolates by using multiplex PCR. *J. Clin. Microbiol.* **2002**, *40*, 2153–2162, doi:10.1128/jcm.40.6.2153-2162.2002.
109. Dallenne, C.; Da Costa, A.; Decré, D.; Favier, C.; Arlet, G. Development of a set of multiplex PCR assays for the detection of genes encoding important beta-lactamases in *Enterobacteriaceae*. *J. Antimicrob. Chemother.* **2010**, *65*, 490–495, doi:10.1093/jac/dkp498.
104. Dolejska, M.; Frolkova, P.; Florek, M.; Jamborova, I.; Purgertova, M.; Kutilova, I.; Cizek, A.; Guenther, S.; Literak, I. CTX-M-15-producing *Escherichia coli* clone B2-O25b-ST131 and *Klebsiella* spp. isolates in municipal wastewater treatment plant effluents. *J. Antimicrob. Chemother.* **2011**, *66*, 2784–2790, doi:10.1093/jac/dkr363.
105. Miranda, A.; Ávila, B.; Díaz, P.; Rivas, L.; Bravo, K.; Astudillo, J.; Bueno, C.; Ulloa, M.T.; Hermosilla, G.; Del Canto, F.; et al. Emergence of Plasmid-Borne *dfrA14* Trimethoprim Resistance Gene in *Shigella sonnei*. *Front. Cell. Infect. Microbiol.* **2016**, *6*, 77, doi:10.3389/fcimb.2016.00077.
103. Šeputienė, V.; Povilonis, J.; Ružauskas, M.; Pavilonis, A.; Sužiedėlienė, E. Prevalence of trimethoprim resistance genes in *Escherichia coli* isolates of human and animal origin in Lithuania. *J. Med. Microbiol.* **2010**, *59*, 315–322, doi:10.1099/jmm.0.015008-0.
108. Kehrenberg, C.; Schwarz, S. Distribution of florfenicol resistance genes *fexA* and *cfr* among chloramphenicol-resistant *Staphylococcus* isolates. *Antimicrob. Agents Chemother.* **2006**, *50*, 1156–1163, doi:10.1128/AAC.50.4.1156-1163.2006.
102. Szczepanowski, R.; Linke, B.; Krahn, I.; Gartemann, K.-H.; Gützkow, T.; Eichler, W.; Pühler, A.; Schlüter, A. Detection of 140 clinically relevant antibiotic-resistance genes in the plasmid metagenome of wastewater treatment plant bacteria showing reduced susceptibility to selected antibiotics. *Microbiology (Reading)* **2009**, *155*, 2306–2319, doi:10.1099/mic.0.028233-0.
96. Sandvang, D.; Aarestrup, F.M. Characterization of aminoglycoside resistance genes and class 1 integrons in porcine and bovine gentamicin-resistant *Escherichia coli*. *Microb. Drug Resist.* **2000**, *6*, 19–27, doi:10.1089/mdr.2000.6.19.
97. Boerlin, P.; Travis, R.; Gyles, C.L.; Reid-Smith, R.; Janecko, N.; Lim, H.; Nicholson, V.; McEwen, S.A.; Friendship, R.; Archambault, M. Antimicrobial resistance and virulence genes of *Escherichia coli* isolates from swine in Ontario. *Appl. Environ. Microbiol.* **2005**, *71*, 6753–6761, doi:10.1128/AEM.71.11.6753-6761.2005.

100. Yamane, K.; Wachino, J.; Suzuki, S.; Arakawa, Y. Plasmid-mediated *qepA* gene among *Escherichia coli* clinical isolates from Japan. *Antimicrob. Agents Chemother.* **2008**, *52*, 1564–1566, doi:10.1128/AAC.01137-07.
98. Gay, K.; Robicsek, A.; Strahilevitz, J.; Park, C.H.; Jacoby, G.; Barrett, T.J.; Medalla, F.; Chiller, T.M.; Hooper, D.C. Plasmid-mediated quinolone resistance in non-Typhi serotypes of *Salmonella enterica*. *Clin. Infect. Dis.* **2006**, *43*, 297–304, doi:10.1086/505397.
106. Wang, M.; Guo, Q.; Xu, X.; Wang, X.; Ye, X.; Wu, S.; Hooper, D.C.; Wang, M. New plasmid-mediated quinolone resistance gene, *qnrC*, found in a clinical isolate of *Proteus mirabilis*. *Antimicrob. Agents Chemother.* **2009**, *53*, 1892–1897, doi:10.1128/AAC.01400-08.
101. Cavaco, L.M.; Hasman, H.; Xia, S.; Aarestrup, F.M. *qnrD*, a novel gene conferring transferable quinolone resistance in *Salmonella enterica* serovar Kentucky and *Bovismorbificans* strains of human origin. *Antimicrob. Agents Chemother.* **2009**, *53*, 603–608, doi:10.1128/AAC.00997-08.
99. Park, C.H.; Robicsek, A.; Jacoby, G.A.; Sahm, D.; Hooper, D.C. Prevalence in the United States of *aac(6')-Ib-cr* encoding a ciprofloxacin-modifying enzyme. *Antimicrob. Agents Chemother.* **2006**, *50*, 3953–3955, doi:10.1128/AAC.00915-06.
